# Supplementary material
Source: publisher figshare collection journal article supplement (https://springernature.figshare.com/ndownloader/files/22008705)
Supplement: Supplementary file 1 [file 22008705]

## Sheet: Sheet1
Additional file to the manuscript
A European Proposal for Quality Control and Quality Assurance of Tandem Mass Spectral Libraries
Herbert Oberacher, Michael Sasse, Jean-Philippe Antignac, Yann Guitton, Laurent Debrauwer, Emilien L. Jamin, Tobias Schulze, Martin Krauss, Adrian Covaci, Noelia Caballero-Casero, Kathleen Rousseau, Annelaure Damont, François Fenaille, Marja Lamoree, Emma L. Schymanski
Name	CompTox_DTXSID	CASRN	InChIKey	IUPAC_Name	SMILES	InChI	Molecular_Formula	Monoisotopic_Mass
Amiloride	DTXSID9043853	2609-46-3	XSDQTOBWRPYKKA-UHFFFAOYSA-N	3,5-Diamino-N-carbamimidoyl-6-chloropyrazine-2-carboxamide	NC(=N)NC(=O)C1=NC(Cl)=C(N)N=C1N	InChI=1S/C6H8ClN7O/c7-2-4(9)13-3(8)1(12-2)5(15)14-6(10)11/h(H4,8,9,13)(H4,10,11,14,15)	C6H8ClN7O	229.048
Phenazone	DTXSID6021117	60-80-0	VEQOALNAAJBPNY-UHFFFAOYSA-N	1,5-Dimethyl-2-phenyl-1,2-dihydro-3H-pyrazol-3-one	CN1N(C(=O)C=C1C)C1=CC=CC=C1	InChI=1S/C11H12N2O/c1-9-8-11(14)13(12(9)2)10-6-4-3-5-7-10/h3-8H,1-2H3	C11H12N2O	188.095
Cyclizine	DTXSID4022864	82-92-8	UVKZSORBKUEBAZ-UHFFFAOYSA-N	1-(Diphenylmethyl)-4-methylpiperazine	CN1CCN(CC1)C(C1=CC=CC=C1)C1=CC=CC=C1	InChI=1S/C18H22N2/c1-19-12-14-20(15-13-19)18(16-8-4-2-5-9-16)17-10-6-3-7-11-17/h2-11,18H,12-15H2,1H3	C18H22N2	266.178
Desipramine	DTXSID6022896	50-47-5	HCYAFALTSJYZDH-UHFFFAOYSA-N	3-(10,11-Dihydro-5H-dibenzo[b,f]azepin-5-yl)-N-methylpropan-1-amine	CNCCCN1C2=C(CCC3=C1C=CC=C3)C=CC=C2	InChI=1S/C18H22N2/c1-19-13-6-14-20-17-9-4-2-7-15(17)11-12-16-8-3-5-10-18(16)20/h2-5,7-10,19H,6,11-14H2,1H3	C18H22N2	266.178
Dibucaine	DTXSID3045271	85-79-0	PUFQVTATUTYEAL-UHFFFAOYSA-N	2-Butoxy-N-[2-(diethylamino)ethyl]quinoline-4-carboxamide	CCCCOC1=CC(C(=O)NCCN(CC)CC)=C2C=CC=CC2=N1	InChI=1S/C20H29N3O2/c1-4-7-14-25-19-15-17(16-10-8-9-11-18(16)22-19)20(24)21-12-13-23(5-2)6-3/h8-11,15H,4-7,12-14H2,1-3H3,(H,21,24)	C20H29N3O2	343.226
Dixyrazine	DTXSID10947639	2470-73-7	MSYUMPGNGDNTIQ-UHFFFAOYSA-N	2-[2-[4-(2-methyl-3-phenothiazin-10-ylpropyl)piperazin-1-yl]ethoxy]ethanol	CC(CN1CCN(CC1)CCOCCO)CN2C3=CC=CC=C3SC4=CC=CC=C42	InChI=1S/C24H33N3O2S/c1-20(18-26-12-10-25(11-13-26)14-16-29-17-15-28)19-27-21-6-2-4-8-23(21)30-24-9-5-3-7-22(24)27/h2-9,20,28H,10-19H2,1H3	C24H33N3O2S	427.229
Dothiepin	DTXSID2022961	113-53-1	PHTUQLWOUWZIMZ-UHFFFAOYSA-N	3-(Dibenzo[b,e]thiepin-11(6H)-ylidene)-N,N-dimethylpropan-1-amine	CN(C)CCC=C1C2=CC=CC=C2CSC2=C1C=CC=C2	InChI=1S/C19H21NS/c1-20(2)13-7-11-17-16-9-4-3-8-15(16)14-21-19-12-6-5-10-18(17)19/h3-6,8-12H,7,13-14H2,1-2H3	C19H21NS	295.139
Ethambutol	DTXSID8023006	74-55-5	AEUTYOVWOVBAKS-UWVGGRQHSA-N	(2S,2'S)-2,2'-(Ethane-1,2-diyldiazanediyl)di(butan-1-ol)	CC[C@@H](CO)NCCN[C@@H](CC)CO	InChI=1S/C10H24N2O2/c1-3-9(7-13)11-5-6-12-10(4-2)8-14/h9-14H,3-8H2,1-2H3/t9-,10-/m0/s1	C10H24N2O2	204.184
Etofylline	DTXSID5023031	519-37-9	NWPRCRWQMGIBOT-UHFFFAOYSA-N	7-(2-Hydroxyethyl)-1,3-dimethyl-3,7-dihydro-1H-purine-2,6-dione	CN1C2=C(N(CCO)C=N2)C(=O)N(C)C1=O	InChI=1S/C9H12N4O3/c1-11-7-6(8(15)12(2)9(11)16)13(3-4-14)5-10-7/h5,14H,3-4H2,1-2H3	C9H12N4O3	224.091
Mefruside	DTXSID0048844	7195-27-9	SMNOERSLNYGGOU-UHFFFAOYSA-N	4-Chloro-N~1~-methyl-N~1~-[(2-methyloxolan-2-yl)methyl]benzene-1,3-disulfonamide	CN(CC1(C)CCCO1)S(=O)(=O)C1=CC=C(Cl)C(=C1)S(N)(=O)=O	InChI=1/C13H19ClN2O5S2/c1-13(6-3-7-21-13)9-16(2)23(19,20)10-4-5-11(14)12(8-10)22(15,17)18/h4-5,8H,3,6-7,9H2,1-2H3,(H2,15,17,18)	C13H19ClN2O5S2	382.042
Metoclopramide	DTXSID6045169	364-62-5	TTWJBBZEZQICBI-UHFFFAOYSA-N	4-Amino-5-chloro-N-[2-(diethylamino)ethyl]-2-methoxybenzamide	CCN(CC)CCNC(=O)C1=CC(Cl)=C(N)C=C1OC	InChI=1S/C14H22ClN3O2/c1-4-18(5-2)7-6-17-14(19)10-8-11(15)12(16)9-13(10)20-3/h8-9H,4-7,16H2,1-3H3,(H,17,19)	C14H22ClN3O2	299.14
Nylidrin	DTXSID4023387	447-41-6	PTGXAUBQBSGPKF-UHFFFAOYSA-N	4-{1-Hydroxy-2-[(4-phenylbutan-2-yl)amino]propyl}phenol	CC(CCC1=CC=CC=C1)NC(C)C(O)C1=CC=C(O)C=C1	InChI=1/C19H25NO2/c1-14(8-9-16-6-4-3-5-7-16)20-15(2)19(22)17-10-12-18(21)13-11-17/h3-7,10-15,19-22H,8-9H2,1-2H3	C19H25NO2	299.189
Phentermine	DTXSID9023461	122-09-8	DHHVAGZRUROJKS-UHFFFAOYSA-N	2-Methyl-1-phenylpropan-2-amine	CC(C)(N)CC1=CC=CC=C1	InChI=1S/C10H15N/c1-10(2,11)8-9-6-4-3-5-7-9/h3-7H,8,11H2,1-2H3	C10H15N	149.12
Sulfamethoxazole	DTXSID8026064	723-46-6	JLKIGFTWXXRPMT-UHFFFAOYSA-N	4-Amino-N-(5-methyl-1,2-oxazol-3-yl)benzene-1-sulfonamide	CC1=CC(NS(=O)(=O)C2=CC=C(N)C=C2)=NO1	InChI=1S/C10H11N3O3S/c1-7-6-10(12-16-7)13-17(14,15)9-4-2-8(11)3-5-9/h2-6H,11H2,1H3,(H,12,13)	C10H11N3O3S	253.052
Sulfamoxole	DTXSID5023617	729-99-7	CYFLXLSBHQBMFT-UHFFFAOYSA-N	4-Amino-N-(4,5-dimethyl-1,3-oxazol-2-yl)benzene-1-sulfonamide	CC1=C(C)N=C(NS(=O)(=O)C2=CC=C(N)C=C2)O1	InChI=1S/C11H13N3O3S/c1-7-8(2)17-11(13-7)14-18(15,16)10-5-3-9(12)4-6-10/h3-6H,12H2,1-2H3,(H,13,14)	C11H13N3O3S	267.068
